# Supplementary material
Source: MDPI journal article supplement (https://www.mdpi.com/2076-0752/8/2/48)

## Supplementary Information: Patterns of Style, Diversity, and Similarity in Middle Orinoco rock art assemblages

**Philip Riris and José Oliver**  
**UCL Institute of Archaeology**

### *1. Outline and overview*

This supplementary information comprises four related files, consisting of:

- I. The following glossary of Middle Orinoco rock art motifs. Executes the rationale described in detail in the paper itself.
- II. A table with descriptive attributes of the sites included in our sample. Attributes include unique identifiers, known site names, geographical data, bibliographic information, panel counts, rock art type, panel type, geology, and compass facing (where possible).
- III. A related table of motif counts (columns) by site (rows). Estimates of “unclassified” motifs are included, but not used in a formal analytical context. This table links to the attribute table via the unique site identifier value.
- IV. An R script file detailing the workflow and results, including production of the figures, as presented in the article.

Together, these files allow for the independent reproduction of the paper results.

### *2. Glossary*

The glossary is ordered the same as the table of motif counts. A description of the definition of motifs can be found in the **Materials and Methods** section of the main article.

|                                                                                                                    |                                                                                      |
|--------------------------------------------------------------------------------------------------------------------|--------------------------------------------------------------------------------------|
| <b>Geometric1</b><br>Enclosed regular geometric shape, internally subdivided.<br>Example: <a href="#">UniqID 1</a> |  |
|--------------------------------------------------------------------------------------------------------------------|--------------------------------------------------------------------------------------|

|                                                                                                                                |                                                                                      |
|--------------------------------------------------------------------------------------------------------------------------------|--------------------------------------------------------------------------------------|
| <p><b>Geometric2</b><br/>Enclosed irregular geometric shape, internally subdivided.<br/>Example: <a href="#">UniqID 1</a></p>  |    |
| <p><b>Geometric3</b><br/>Wavy parallel lines. Example: <a href="#">UniqID 2 (right)</a></p>                                    |     |
| <p><b>Geometric4</b><br/>Concentric u-shaped lines. Example (sketch only): <a href="#">UniqID 6</a>.</p>                       |     |
| <p><b>Geometric5</b><br/>Unenclosed regular geometric shape. Example: <a href="#">UniqID 8</a>.</p>                            |   |
| <p><b>Geometric 6</b><br/>Closed irregular geometric shape without internal components. Example: <a href="#">UniqID 11</a></p> |   |
| <p><b>Geometric 7</b><br/>Closed regular geometric shape without internal components. Example: <a href="#">UniqID 13</a></p>   |  |

|                                                                                                                                                                                                           |                                                                                     |  |
|-----------------------------------------------------------------------------------------------------------------------------------------------------------------------------------------------------------|-------------------------------------------------------------------------------------|--|
| <p><b>Geometric 8</b><br/>Unenclosed irregular geometric shape. Example: <a href="#">UniqID 17</a></p>                                                                                                    |   |  |
| <p><b>Trap1</b><br/>A triangle with internal subdivisions, occasionally with appendages. Variously described as a fishtrap-like motif (Williams 1985), or a flute. Example: <a href="#">UniqID 13</a></p> |    |  |
| <p><b>Cross1</b><br/>Outlined cross motif. Example: <a href="#">UniqID 1</a></p>                                                                                                                          |  |  |
| <p><b>Cross2</b><br/>Open outlined cross motif. Example: <a href="#">UniqID 13</a></p>                                                                                                                    |  |  |
| <p><b>Cross3</b><br/>Multiple conjoined outlined crosses. Example: <a href="#">UniqID 14</a></p>                                                                                                          |  |  |

|                                                                                                                                       |                                                                                      |  |
|---------------------------------------------------------------------------------------------------------------------------------------|--------------------------------------------------------------------------------------|--|
| <p><b>Cross4</b><br/>Simple cross. Example: <a href="#">UniqID 113</a></p>                                                            |    |  |
| <p><b>Bird1</b><br/>Portrait view of body with wings outstretched, head in profile<br/>Example: <a href="#">UniqID 1</a></p>          |   |  |
| <p><b>Bird2</b><br/>Full profile view of body, head, and legs of birdlike creature.<br/>Example: <a href="#">UniqID 13</a></p>        |   |  |
| <p><b>Bird3</b><br/>Portrait view of body with wings outstretched, head geometric or face-on. Example: <a href="#">UniqID 114</a></p> |  |  |



|                                                                                                                                  |                                                                                      |
|----------------------------------------------------------------------------------------------------------------------------------|--------------------------------------------------------------------------------------|
| <p><b>Reptile1</b><br/>Turtle-like animal shape, overhead view. Example: <a href="#">UniqID 11</a></p>                           |     |
| <p><b>Reptile2</b><br/>Lizard-like animal stick figure with splayed legs, overhead view. Example: <a href="#">UniqID 13</a>.</p> |     |
| <p><b>Animal1</b><br/>Row of animals on a line. Example: <a href="#">UniqID 6</a></p>                                            |  |
| <p><b>Animal2</b><br/>Quadruped animal, filled or recessed body, in profile. Example: <a href="#">UniqID 6</a></p>               |  |
| <p><b>Animal3</b><br/>Quadruped in plan, hollow or recessed body. Example: <a href="#">UniqID 17</a></p>                         |  |

|                                                                                                                                                                   |                                                                                      |
|-------------------------------------------------------------------------------------------------------------------------------------------------------------------|--------------------------------------------------------------------------------------|
| <p><b>Animal4</b><br/>Millipede or centipede. Example:<br/><a href="#">UniqID 3</a></p>                                                                           |     |
| <p><b>Animal5</b><br/>Bat-like creature. Example:<br/><a href="#">UniqID 114</a></p>                                                                              |                                                                                      |
| <p><b>Fish1</b><br/>Fish in profile, body infilled.<br/>Example: <a href="#">UniqID 8.</a></p>                                                                    |    |
| <p><b>Fish2</b><br/>Fish in profile, with internal components.<br/>Example: <a href="#">UniqID 9</a></p>                                                          |    |
| <p><b>Dots1</b><br/>Groups of small dots in close proximity, sometimes forming a shape, most commonly squares or triangles. Example: <a href="#">UniqID 1</a></p> |  |

**Dots2**

Dots in columns or rows.

Example: [UniqID 13](#)

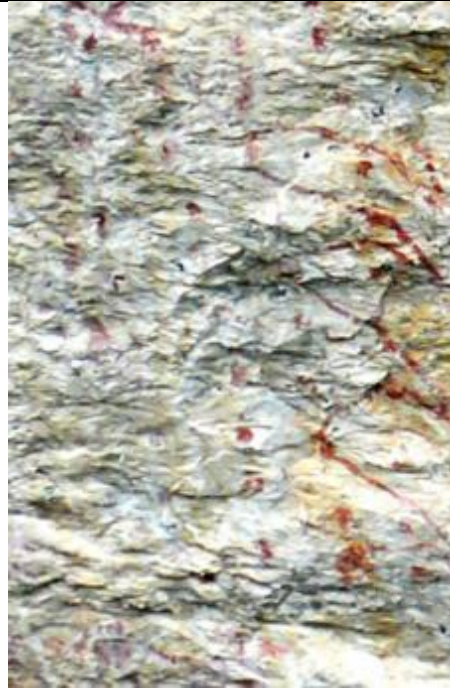**Dots3**

Dots in combination with lines or geometric shapes. Example:

[UniqID 115](#)

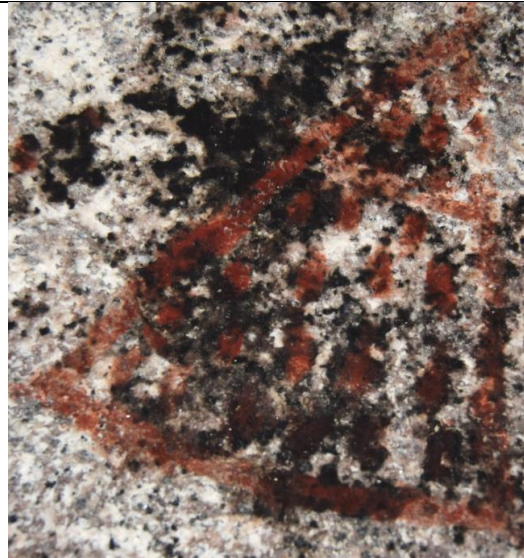**Bar1**

Simple bar with end appendages, an H shape. Example: [UniqID 1](#)

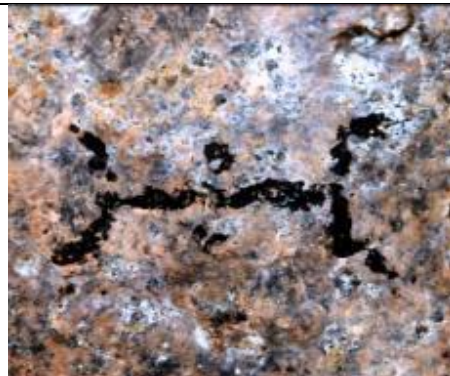



|                                                                                                                                                        |                                                                                      |  |
|--------------------------------------------------------------------------------------------------------------------------------------------------------|--------------------------------------------------------------------------------------|--|
| <p><b>Bar2</b></p> <p>Outlined bar with appendages and concentric circles. Example: <a href="#">UniqID 13</a></p>                                      |     |  |
| <p><b>Bar3</b></p> <p>Circles connected by bar. Example: <a href="#">UniqID 13</a></p>                                                                 |    |  |
| <p><b>Bar4</b></p> <p>Simple bar with asymmetric appendages, or single appendage (O-shape, Y-shape or T-shape). Example: <a href="#">UniqID 14</a></p> |   |  |
| <p><b>Bar5</b></p> <p>Circles connected by dashes. Example: <a href="#">UniqID 15</a></p>                                                              |  |  |



|                                                                                                  |                                                                                     |
|--------------------------------------------------------------------------------------------------|-------------------------------------------------------------------------------------|
| <p><b>Line1</b><br/>Simple line. Example: <u>UniqID 7</u><br/>(<u>sketch only</u>)</p>           |    |
| <p><b>Line2</b><br/>Line with perpendicular offshoots on one side. Example: <u>UniqID 8.</u></p> |   |
| <p><b>Line3</b><br/>Straight parallel lines. Example: <u>UniqID 14.</u></p>                      |  |
| <p><b>Line4</b><br/>Zig-zagging line. Example: <u>UniqID 11</u></p>                              |  |

|                                                                                                                    |                                                                                      |  |
|--------------------------------------------------------------------------------------------------------------------|--------------------------------------------------------------------------------------|--|
| <p><b>Line5</b><br/> Straight line with perpendicular offshoots on both sides.<br/> Example: <u>UniqID 11.</u></p> |    |  |
| <p><b>Human1</b><br/> Long hollow body with internal subdivision frontal view.<br/> Example: <u>UniqID 1</u></p>   |   |  |
| <p><b>Human2</b><br/> Short body with solid fill frontal view. Example: <u>UniqID 2</u></p>                        |  |  |
| <p><b>Human3</b><br/> Short body with internal subdivisions. Example: <u>UniqID 5</u></p>                          |  |  |

|                                                                                                                                                                      |                                                                                     |
|----------------------------------------------------------------------------------------------------------------------------------------------------------------------|-------------------------------------------------------------------------------------|
| <p><b>Human4</b><br/>Series of human stick figures attached to a line, analogous to Animal1 motif. Example: <a href="#">UniqID 13</a></p>                            |   |
| <p><b>Human5</b><br/>Essentially identical to <b>Human4</b>, but with quadrupeds (as in <b>Animal1</b>) attached to the line. Example: <a href="#">UniqID 13</a></p> |   |
| <p><b>Human6</b><br/>Human in profile, filled body. Example: <a href="#">UniqID 13</a></p>                                                                           |  |
| <p><b>Human7</b><br/>Stick-figure human in frontal view. Example: <a href="#">UniqID 17</a></p>                                                                      |  |



|                                                                                                                                                               |                                                                                      |  |
|---------------------------------------------------------------------------------------------------------------------------------------------------------------|--------------------------------------------------------------------------------------|--|
| <p><b>Human8</b></p> <p>Hollow body frontal view, without internal subdivisions.</p> <p>Example: <a href="#">UniqID 17</a></p>                                | 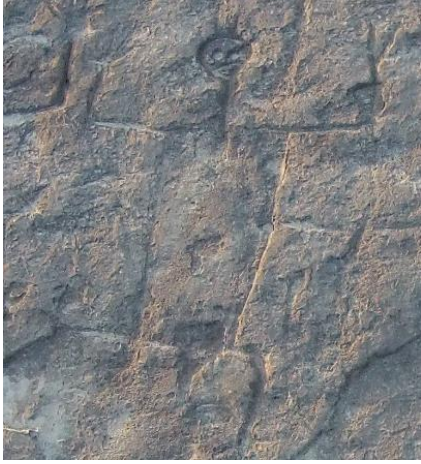   |  |
| <p><b>Human9</b></p> <p>Flautist in profile. Example: <a href="#">UniqID 17</a></p>                                                                           |     |  |
| <p><b>Human11</b></p> <p>Triangular or rounded body with subdivisions, and 'skirt' Example: <a href="#">UniqID 116</a></p>                                    |   |  |
| <p><b>Face2</b></p> <p>Face without body, defined in outline with facial features and adornments or appendages.</p> <p>Example: <a href="#">UniqID 17</a></p> |  |  |

|                                                                                                                                                                                       |                                                                                      |  |
|---------------------------------------------------------------------------------------------------------------------------------------------------------------------------------------|--------------------------------------------------------------------------------------|--|
| <p><b>Grid1</b><br/>Grid of lozenges and/or circles.<br/>Constituents could be broken down into shapes such as <b>Chain1</b> or <b>Chain2</b>. Example: <a href="#">UniqID 13</a></p> |    |  |
| <p><b>Chain1</b><br/>Linked lozenge-shaped chain.<br/>Example: <a href="#">UniqID 1</a></p>                                                                                           |     |  |
| <p><b>Chain2</b><br/>Linked circular chain. Example: <a href="#">UniqID 8</a></p>                                                                                                     |   |  |
| <p><b>Chain3</b><br/>Linked chain of <b>Geometric1</b>-like motifs. Example: <a href="#">UniqID 120</a></p>                                                                           |  |  |

|                                                                                             |                                                                                      |
|---------------------------------------------------------------------------------------------|--------------------------------------------------------------------------------------|
| <p><b>Circle1</b><br/>Rayed circle. Example: <a href="#">UniqID 1</a></p>                   |     |
| <p><b>Circle2</b><br/>Concentric circle. Example: <a href="#">UniqID 2</a></p>              |     |
| <p><b>Circle3</b><br/>Circle with dots in the centre. Example: <a href="#">UniqID 6</a></p> |    |
| <p><b>Circle4</b><br/>Segmented circle. Example: <a href="#">UniqID 11</a>.</p>             |  |
| <p><b>Circle5</b><br/>Conjoined concentric circles. Example: <a href="#">UniqID 13</a></p>  |  |



|                                                                                                                             |                                                                                     |
|-----------------------------------------------------------------------------------------------------------------------------|-------------------------------------------------------------------------------------|
| <p><b>Circle6</b><br/>Circle rayed with one or more scrolls. Example: <a href="#">UniqID 114</a></p>                        |   |
| <p><b>Spiral1</b><br/>Simple spiral line. Example: <a href="#">UniqID 8</a></p>                                             |    |
| <p><b>Snake1</b><br/>Triangular head, zigzagged body. Cerro Pintado main petroglyph. Example: <a href="#">UniqID 3</a>.</p> |   |
| <p><b>Scroll1</b><br/>Double-ended scroll. Example: <a href="#">UniqID 11</a></p>                                           |  |
| <p><b>Scroll2</b><br/>Single scroll. Example: <a href="#">UniqID 11</a></p>                                                 |  |
| <p><b>Scroll3</b><br/>Multiple scroll. Example: <a href="#">UniqID 13</a></p>                                               |  |

|                                                                                                                                                                                                                                                                        |                                                                                      |  |
|------------------------------------------------------------------------------------------------------------------------------------------------------------------------------------------------------------------------------------------------------------------------|--------------------------------------------------------------------------------------|--|
| <p><b>Scroll4</b></p> <p>One or more scrolls in association with a geometric shape. Example: <a href="#">UniqID 116</a></p>                                                                                                                                            |    |  |
| <p><b>Hand1</b></p> <p>Simple handprint. Example: <a href="#">UniqID 11</a></p>                                                                                                                                                                                        |     |  |
| <p><b>Foot1</b></p> <p>Footprint. Example: <a href="#">UniqID 11</a></p>                                                                                                                                                                                               |    |  |
| <p><b>Plant1</b></p> <p>Sprout-like line drawing, reminiscent of a plant. Example: <a href="#">UniqID 13</a>.</p>                                                                                                                                                      |   |  |
| <p><b>Composite1</b></p> <p>Composition of various different motifs, including scrolls, spirals, and geometrics, rarely animals or humans. Common and variable enough to warrant a category separate from <b>Unclassified</b>. Example: <a href="#">UniqID 116</a></p> |  |  |

**Composite2**

Composition of various motifs,  
with a significant proportion of  
human or animal figures.

Example: UniqID 20

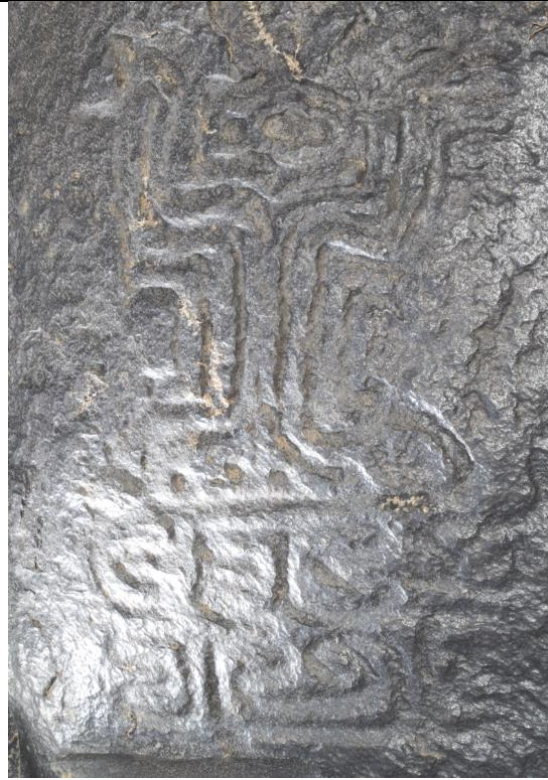

Supplement: s1 [file s1]
